# Supplementary material for: Multimodality imaging of naturally active melanin nanoparticles targeting somatostatin receptor subtype 2 in human small-cell lung cancer
Source: Royal Society of Chemistry journal article supplement (doi:10.1039/c9nr04371c), 2019-01-01
Supplement: c9nr04371c1.pdf [file c9nr04371c1.pdf]

## Electronic Supplementary Information

### Multimodality Imaging of Naturally Active Melanin Nanoparticles Targeting Somatostatin Receptor Subtype 2 in Human Small-Cell Lung Cancer†

Lei Xia<sup>a</sup> Xiaoyi Guo<sup>a</sup> Teli Liu<sup>a</sup> Xiaoxia Xu<sup>a</sup> Jinquan Jiang<sup>a</sup> Feng Wang<sup>a</sup>  
Zhen Cheng<sup>b</sup> Hua Zhu<sup>\*,a</sup> Zhi Yang<sup>\*,a</sup>

<sup>(a)</sup> Key Laboratory of Carcinogenesis and Translational Research (Ministry of Education/Beijing), Department of Nuclear Medicine, Peking University Cancer Hospital & Institute, Beijing 100142)

<sup>(b)</sup> Molecular Imaging Program at Stanford (MIPS) and Bio-X Program, Department of Radiology, School of Medicine, Stanford University, Stanford, California, 94305)

| Tissue (%ID/g) | 2 h        | 24 h       | 48 h       |
|----------------|------------|------------|------------|
| Heart          | 4.89±0.59  | 1.98±0.22  | 1.66±0.20  |
| Liver          | 28.9±0.51  | 17.61±4.09 | 13.54±5.04 |
| Spleen         | 13.88±0.55 | 9.18±1.54  | 10.69±3.19 |
| Kidney         | 11.11±0.79 | 5.59±2.88  | 5.78±1.34  |
| Lung           | 7.25±0.78  | 2.96±0.77  | 2.46±0.32  |
| Gastric        | 4.92±1.68  | 2.06±0.43  | 2.80±0.74  |
| Intestine      | 5.65±1.16  | 2.44±0.12  | 4.47±1.00  |
| Muscle         | 5.05±3.11  | 1.84±0.41  | 2.15±0.15  |
| Tumor          | 3.3±1.02   | 8.03±0.37  | 5.88±0.40  |
| Blood          | 18.86±0.44 | 4.54±1.13  | 1.85±0.18  |

**Table S1.** Tissue biodistribution of (<sup>124</sup>I, Mn)-Oct-PEG-MNP in NCI-H69 mice.

Values shown represent mean ± SD (n=3)

| Tissue (%ID/g) | 2 h        | 24 h      | 48 h        |
|----------------|------------|-----------|-------------|
| Heart          | 4.26±1.6   | 2.36±0.75 | 2.47±0.65   |
| Liver          | 26.6±7.27  | 8.91±1.92 | 6.84±2.12   |
| Spleen         | 10.93±1.44 | 5.38±1.18 | 4.03±0.66   |
| Kidney         | 8.25±0.88  | 3.58±1.35 | 3.5±0.68    |
| Lung           | 8.01±2.52  | 4.66±2.44 | 5.04±0.58   |
| Gastric        | 3.77±1.77  | 1.88±0.14 | 2.38±0.06   |
| Intestine      | 6.56±0.36  | 4.05±0.89 | 6.37±1.62   |
| Muscle         | 1.09±0.11  | 0.72±0.22 | 1.35±1.44   |
| Tumor          | 2.7±0.11   | 3.35±0.54 | 3.08 ± 0.54 |
| Blood          | 10.6±1.11  | 1.87±0.35 | 2.46±0.34   |

**Table S2.** Tissue biodistribution of (<sup>124</sup>I, Mn)-Oct-PEG-MNP in A549 mice.

Values shown represent mean ± SD (n=3)

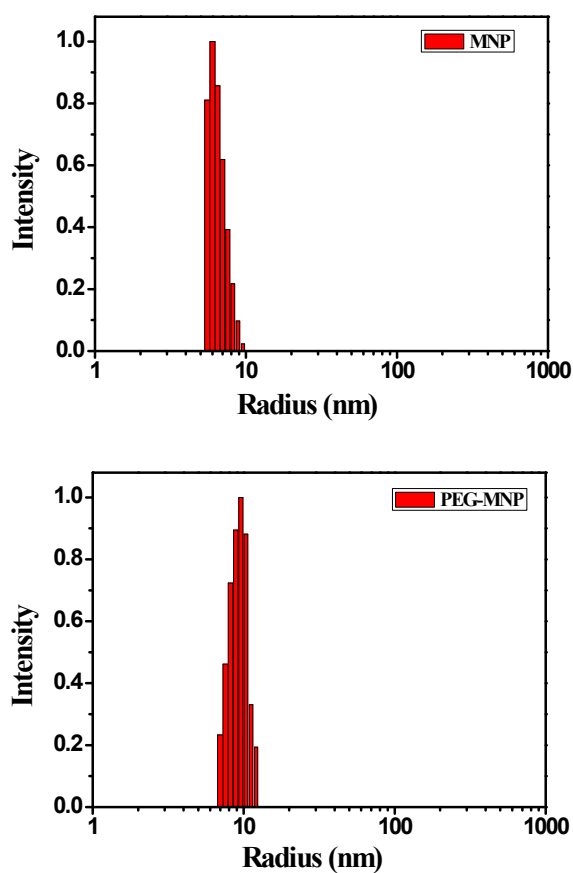

Figure S1. Hydrodynamic size distribution graphs of MNPs (top) and PEG-MNP (bottom).

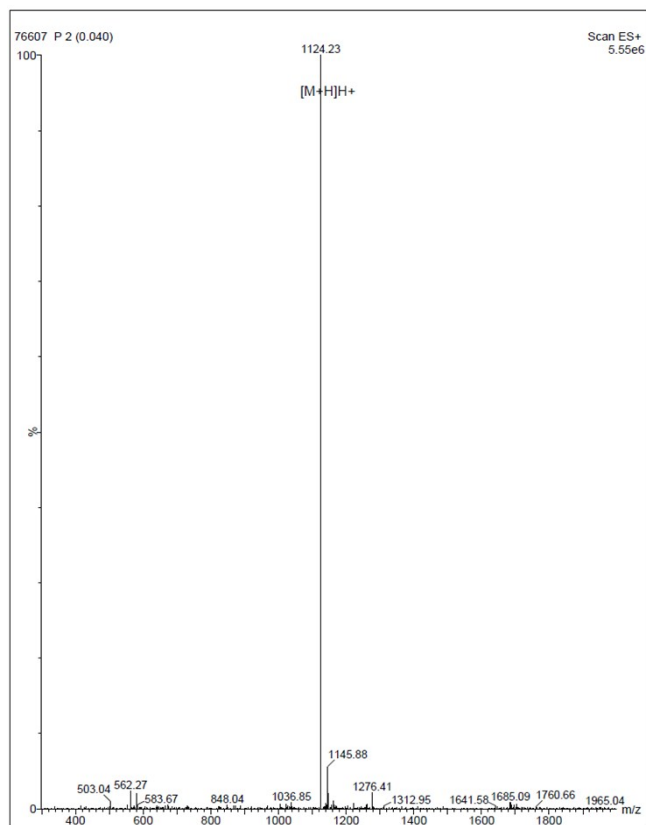

Figure S2. The MALDI-TOF analysis of Oct-SH.

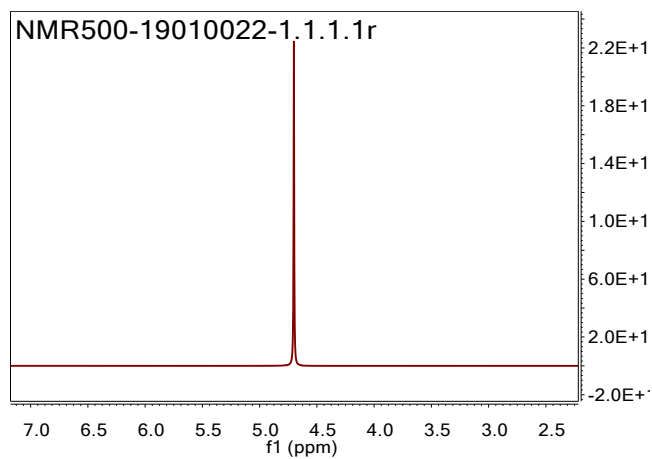

Figure S3. <sup>1</sup>H-NMR spectra of MNPs in D<sub>2</sub>O.

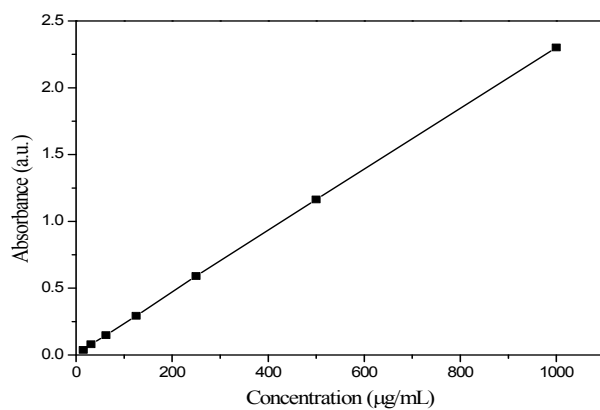

Figure S4. A linear relationship for the optical absorbance of Oct-PEG-MNP with different concentrations at 340 nm.

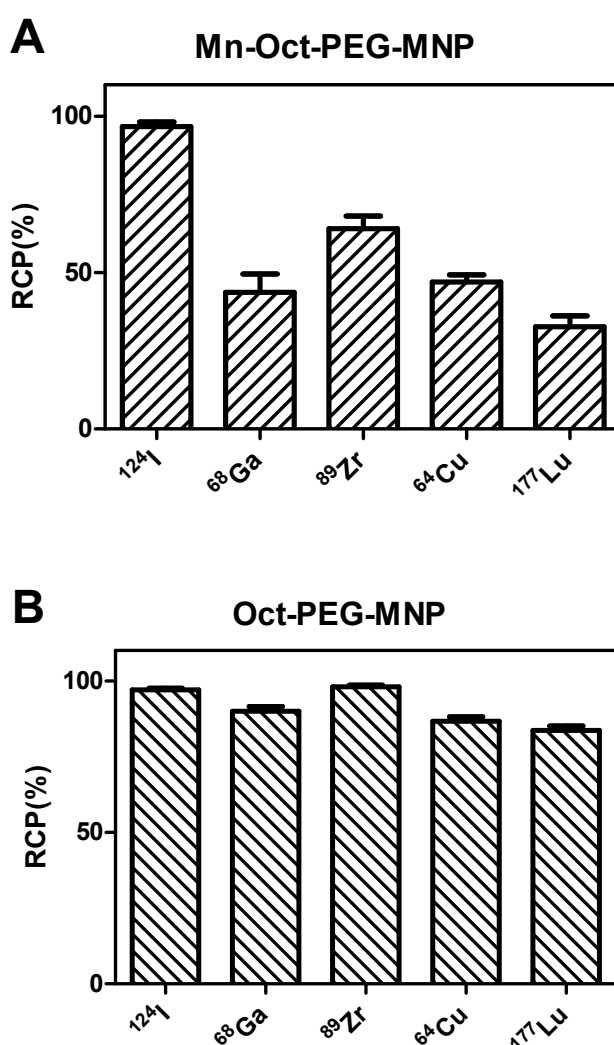

Figure S5. A) The labeling rate of <sup>124</sup>I and four kinds of metal radionuclides with saturated Mn<sup>2+</sup> labeled OCY-PEG-MNP. The results from left to right were <sup>124</sup>I (96.7 ± 2.5%), <sup>68</sup>Ga (43.7 ± 10%), <sup>89</sup>Zr (64 ± 7%), <sup>64</sup>Cu (47 ± 4%) and <sup>177</sup>Lu (32.7 ± 6%). B) The labeling rate of <sup>124</sup>I and four kinds of metal radionuclides with OCT-PEG-MNP. The results from left to right were <sup>124</sup>I (97 ± 1%), <sup>68</sup>Ga (90 ± 2.6%), <sup>89</sup>Zr (98 ± 1%), <sup>64</sup>Cu (87 ± 2.5%) and <sup>177</sup>Lu (84 ± 2.5%).

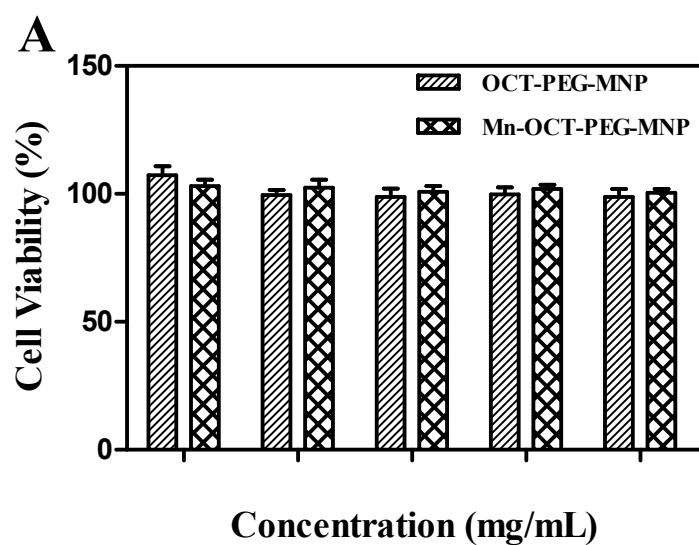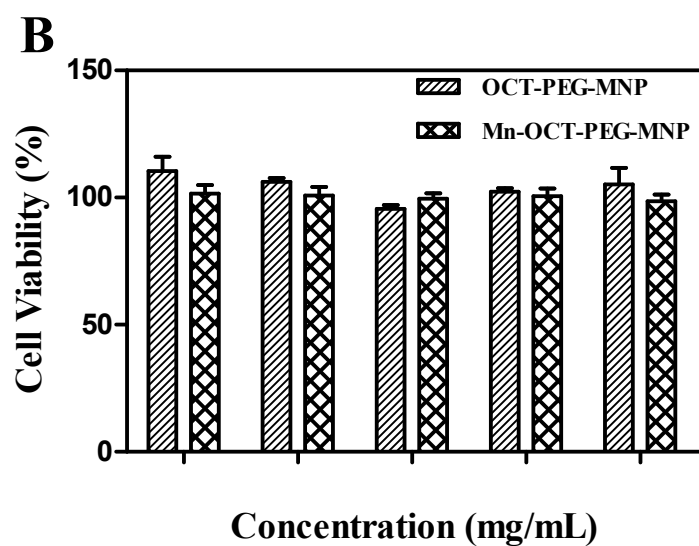

Figure S6. MTT assay using A549 (A) and HeLa (B) cells with OCT-PEG-MNP and Mn-OCT-PEG-MNP concentrations 0.0625, 0.125, 0.25, 0.5 and 1 mg/mL after 24 h incubation at 37 °C.

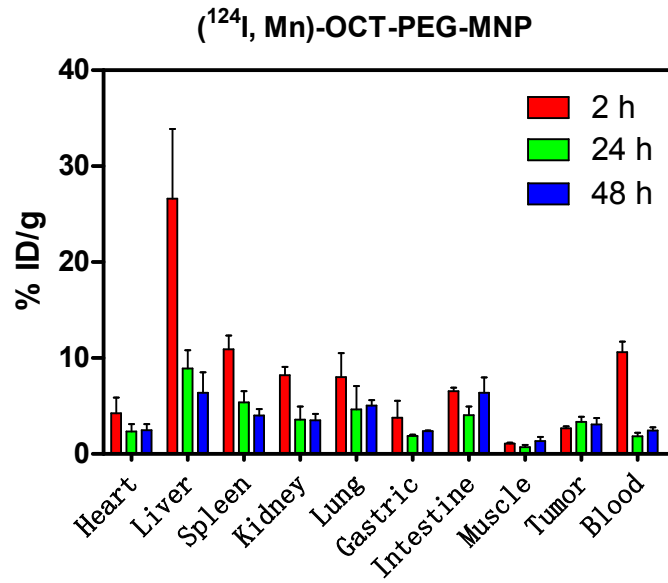

Figure S7. Biodistribution of (<sup>124</sup>I, Mn)-Oct-PEG-MNP in A549 tumor mice (n = 3) measured at 2, 24, and 48 h after tail vein injection. The radioactive signal of Heart, Liver, Spleen, Kidney, Lung, Gastric, Intestine, Muscle, Tumor and Blood were measured by Gamma Counter after removed from vivo, respectively. The data were expressed as %ID/g ± SEM.

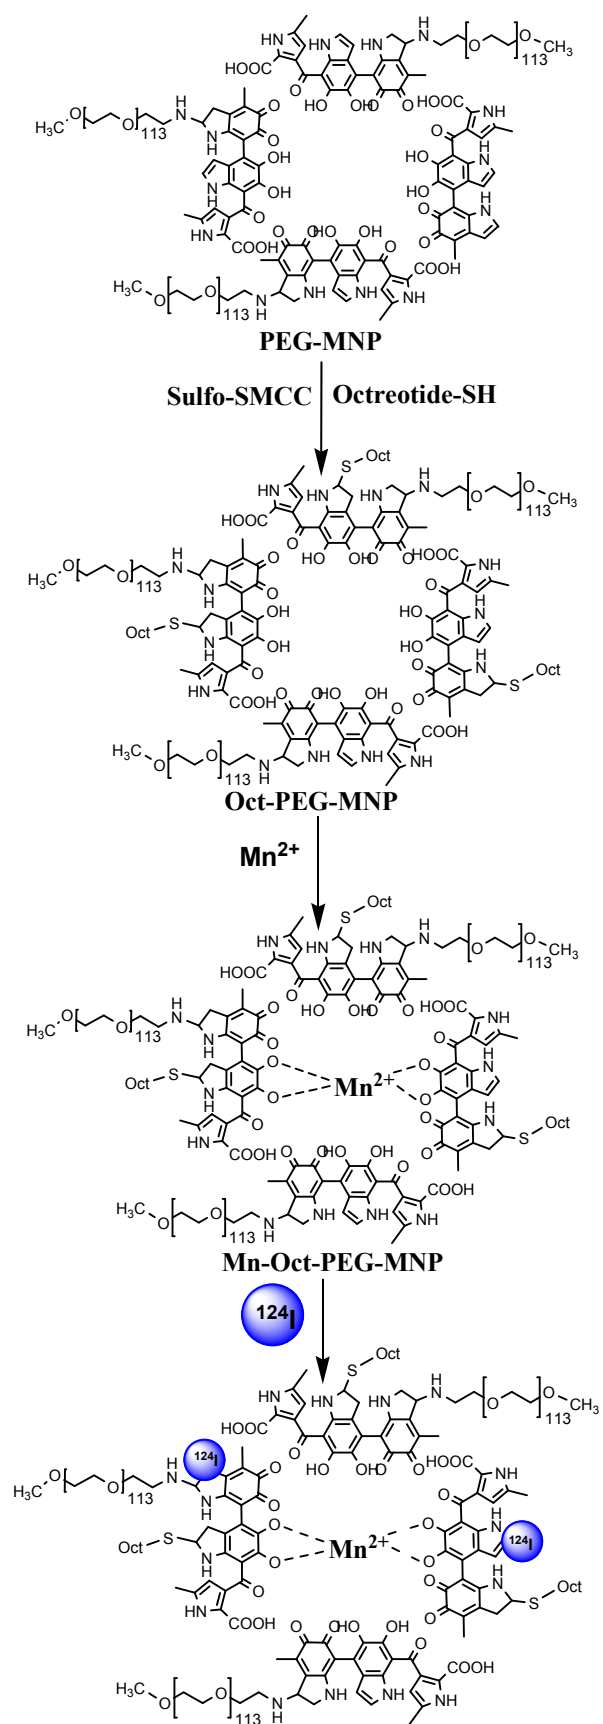

Figure S8. Synthetic route of (<sup>124</sup>I, Mn)-Oct-PEG-MNP.
